# Supplementary material for: Time rescaling reproduces EEG behavior during transition from propofol anesthesia-induced unconsciousness to consciousness
Source: PubMed Central journal article supplement (PMC5902625; doi:10.1038/s41598-018-24405-z), 2018-04-16
Supplement: 41598_2018_24405_MOESM1_ESM.pdf [file 41598_2018_24405_MOESM1_ESM.pdf]

# **Time rescaling reproduces EEG behavior during transition from propofol anesthesia-induced unconsciousness to consciousness**

**S. Bousсен, A. Spiegler, C. Benar, M. Carrère, F. Bartolomei, P. Metellus, R. Voituriez, L. Velly, N. Bruder, A. Trébuchon**

## **ESM 1: Patients' individual results**

| State /                     | Patient n°                      | 1               | 2               | 3               | 4               | 5               | 6               |
|-----------------------------|---------------------------------|-----------------|-----------------|-----------------|-----------------|-----------------|-----------------|
| <b>Number of electrodes</b> |                                 | <b>40</b>       | <b>35</b>       | <b>34</b>       | <b>40</b>       | <b>21</b>       | <b>26</b>       |
| U                           | $f_U$ (Hz)                      | $11.3 \pm 0.2$  | $12.0 \pm 0.2$  | $11.3 \pm 0.4$  | $12.7 \pm 0.6$  | $11.0 \pm 0.3$  | $11.3 \pm 0.1$  |
| U                           | $\delta f_U$ (Hz)               | $2.8 \pm 0.1$   | $2.8 \pm 0.2$   | $2.6 \pm 0.2$   | $2.9 \pm 0.3$   | $2.6 \pm 0.1$   | $2.6 \pm 0.1$   |
| U                           | Q                               | $4.1 \pm 0.2$   | $4.3 \pm 0.2$   | $4.3 \pm 0.2$   | $4.3 \pm 0.3$   | $4.1 \pm 0.2$   | $4.3 \pm 0.1$   |
| U                           | Amplitude (A.U)                 | $0.9 \pm 0.4$   | $1.4 \pm 0.6$   | $1.1 \pm 0.4$   | $0.6 \pm 0.3$   | $1.2 \pm 0.5$   | $0.5 \pm 0.1$   |
| C                           | $f_U$ (Hz)                      | $18.2 \pm 1.1$  | $18.5 \pm 1.5$  | $18.9 \pm 1.0$  | $19.1 \pm 1.9$  | $19.1 \pm 1.4$  | $19.2 \pm 1.5$  |
| C                           | $\delta f_U$ (Hz)               | $4.4 \pm 0.3$   | $4.3 \pm 0.3$   | $4.1 \pm 0.2$   | $4.4 \pm 0.3$   | $4.4 \pm 0.2$   | $4.6 \pm 0.3$   |
| C                           | Q                               | $4.1 \pm 0.2$   | $4.3 \pm 0.2$   | $4.6 \pm 0.2$   | $4.3 \pm 0.4$   | $4.3 \pm 0.3$   | $4.2 \pm 0.3$   |
| C                           | Amplitude (A.U)                 | $0.2 \pm 0.1$   | $0.4 \pm 0.2$   | $1.0 \pm 0.7$   | $0.9 \pm 1.0$   | $0.4 \pm 0.2$   | $0.2 \pm 0.1$   |
| C/U                         | $f_C / f_U$                     | $1.60 \pm 0.1$  | $1.55 \pm 0.1$  | $1.68 \pm 0.1$  | $1.52 \pm 0.2$  | $1.72 \pm 0.1$  | $1.70 \pm 0.1$  |
| C/U                         | $\delta f_C / \delta f_U$       | $1.61 \pm 0.1$  | $1.56 \pm 0.1$  | $1.56 \pm 0.1$  | $1.53 \pm 0.2$  | $1.66 \pm 0.1$  | $1.72 \pm 0.1$  |
| U <sub>Fast</sub>           | $f_U$ (Hz)                      | $17.9 \pm 0.7$  | $18.1 \pm 1.0$  | $18.3 \pm 0.7$  | $19.0 \pm 1.0$  | $18.9 \pm 0.6$  | $19.3 \pm 0.2$  |
| U <sub>Fast</sub>           | $\delta f_U$ (Hz)               | $4.4 \pm 0.2$   | $4.3 \pm 0.3$   | $4.4 \pm 0.2$   | $4.3 \pm 0.4$   | $4.6 \pm 0.2$   | $4.2 \pm 0.1$   |
| U <sub>Fast</sub>           | Q                               | $4.1 \pm 0.2$   | $4.2 \pm 0.2$   | $4.2 \pm 0.2$   | $4.5 \pm 0.4$   | $4.1 \pm 0.2$   | $4.2 \pm 0.3$   |
| U <sub>Fast</sub>           | Amplitude (A.U)                 | $0.25 \pm 0.1$  | $0.4 \pm 0.2$   | $0.4 \pm 0.1$   | $0.8 \pm 0.8$   | $0.4 \pm 0.2$   | $0.15 \pm 0.05$ |
| C/U <sub>Fast</sub>         | $f_C / f_{UFast}$               | $1.58 \pm 0.04$ | $1.51 \pm 0.05$ | $1.62 \pm 0.03$ | $1.50 \pm 0.05$ | $1.71 \pm 0.04$ | $1.71 \pm 0.05$ |
| C/U <sub>Fast</sub>         | $\delta f_C / \delta f_{UFast}$ | $1.60 \pm 0.07$ | $1.54 \pm 0.1$  | $1.66 \pm 0.08$ | $1.45 \pm 0.1$  | $1.72 \pm 0.04$ | $1.61 \pm 0.05$ |
