# Supplementary material for: Time rescaling reproduces EEG behavior during transition from propofol anesthesia-induced unconsciousness to consciousness
Source: PubMed Central journal article supplement (PMC5902625; doi:10.1038/s41598-018-24405-z), 2018-04-16
Supplement: 41598_2018_24405_MOESM2_ESM.pdf [file 41598_2018_24405_MOESM2_ESM.pdf]

# **Time rescaling reproduces EEG behavior during transition from propofol anesthesia-induced unconsciousness to consciousness**

**S. Boussen, A. Spiegler, C. Benar, M. Carrère, F. Bartolomei, P. Metellus, R. Voituriez, L. Velly, N. Bruder, A. Trébuchon**

**ESM 2: Transition Time and Coherent Time change during recovery of consciousness**

| State / Patient n°                 | 1             | 2               | 3             | 4               | 5             | 6             |
|------------------------------------|---------------|-----------------|---------------|-----------------|---------------|---------------|
| Transition rate (s <sup>-1</sup> ) | 0.021 ± 0.003 | 0.0056 ± 0.0008 | 0.006 ± 0.001 | 0.0026 ± 0.0004 | 0.004 ± 0.001 | 0.012 ± 0.003 |
| Transition Time (s)                | 77            | 295             | 284           | 673             | 453           | 130           |
| Time Width (ms)                    |               |                 |               |                 |               |               |
| U                                  | 154 ± 47      | 151 ± 48        | 145 ± 41      | 136 ± 38        | 150 ± 41      | 149 ± 42      |
| C                                  | 91 ± 28       | 99 ± 23         | 99 ± 38       | 85 ± 20         | 94 ± 31       | 93 ± 27       |
| U/C                                | 1.69          | 1.53            | 1.46          | 1.60            | 1.60          | 1.60          |
